# Supplementary material for: Copper(ii) salen-based complexes as potential anticancer agents
Source: Royal Society of Chemistry journal article supplement (doi:10.1039/d2nj02170f), 2022-01-01
Supplement: d2nj02170f1.pdf [file d2nj02170f1.pdf]

## Copper(II) Salen based Complexes as Potential Anticancer Agents

Nithya Mohan<sup>a</sup>, Vidhya C.V.<sup>b</sup>, Suni V.<sup>b</sup> Jimna Mohamed Ameer<sup>c</sup>, Naresh Kasoju<sup>c</sup>, P. V. Mohanan<sup>a</sup>,  
Sreejith S. S.<sup>d</sup>, \*<sup>a</sup> and M. R. Prathapachandra Kurup \*<sup>a, e</sup>

### Infrared Spectral Data

Infrared spectra of the four compounds are shown in Figure 1. The compound **1** shows a twin peak around 3500 cm<sup>-1</sup> which indicate the presence of encapsulated water molecule and falls under the category of inclusion compounds.

**Table S1** IR spectral values in cm<sup>-1</sup> of compounds **1** to **4**

| Compound | $\nu(\text{OH}) / (\text{H}_2\text{O})$ | $\nu(\text{C}=\text{N})$ | $\nu(\text{C}-\text{O})$ | $\nu(\text{C}-\text{OMe})$ |
|----------|-----------------------------------------|--------------------------|--------------------------|----------------------------|
| <b>1</b> | 3434                                    | 1642                     | 1309                     | 1231                       |
| <b>2</b> | 3449                                    | 1639                     | 1319                     | 1230                       |
| <b>3</b> | 3391                                    | 1630                     | 1321                     | 1230                       |
| <b>4</b> | 3501(Asy),<br>3419 (sym)                | 1641                     | 1313                     | 1229                       |

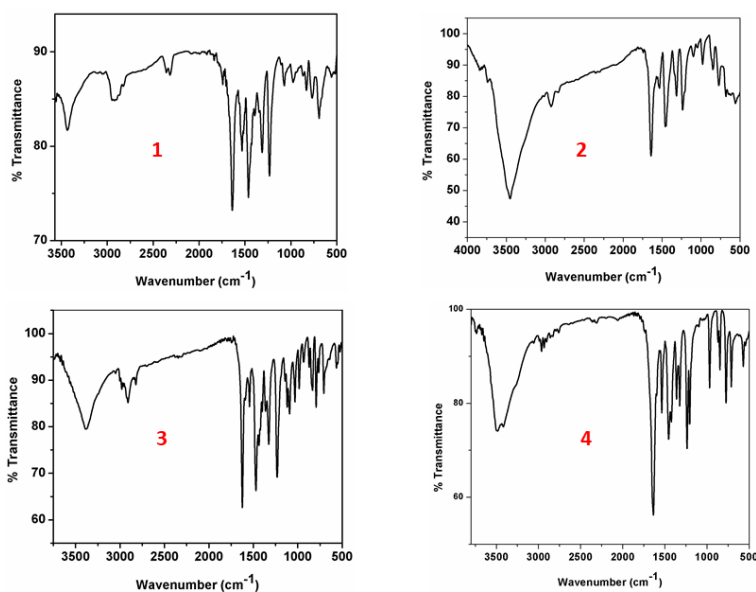

**Fig. S1** IR spectra of compounds **1** to **4**.

## Electronic Spectral Data

Electronic spectra of the compounds (**1** to **4**) were recorded in DMF solution at room temperature. In order to obtain the transitions other than *dd*, the spectrum was recorded in  $10^{-5}$  M concentration whereas the *dd* bands were obtained only at higher concentration i.e.  $10^{-3}$  M concentration in the same solvent.

The peak around 400 nm in all the four compounds represents the intraligand charge transfer transition that may originate from the donor atoms such as oxygen and nitrogen to the central metal atom. The peak observed just below 300 nm which can be assigned as  $\pi \rightarrow \pi^*/n \rightarrow \pi^*$  transition (Fig. S2 and Table S2). The *dd* band could be observed as a broad peak above 500 nm (Fig. S3). In the case of Cu(II) compounds the *dd* bands were originated by the hole transition from the high energy *d* orbital to the lower lying ones. In the case of compounds **1**, **3** and **4**, the *dd* band originated by the hole transition from  $d_{x^2-y^2}$  to the lower energy orbitals. These transitions can be assigned as  ${}^2B_{1g} \rightarrow {}^2B_{2g}$  ( $d_{x^2-y^2} \rightarrow d_{xy}$ ),  ${}^2B_{1g} \rightarrow {}^2A_{1g}$  ( $d_{x^2-y^2} \rightarrow d_{z^2}$ ) and  ${}^2B_{1g} \rightarrow {}^2E_g$  ( $d_{x^2-y^2} \rightarrow d_{xz}, d_{yz}$ ) in compounds since they have square planar or near square pyramidal geometry. Since the four low-lying orbitals have little energy difference between them, the individual transfer between these orbitals and the upper *d* level cannot be resolved into three bands and hence a single absorption band is observed.<sup>1,2</sup> The compound **1** has a distorted square-pyramidal geometry hence the second most energy level state is  $d_{z^2}$ . The compound **2** adopts a trigonal bipyramidal geometry (TBP) so the hole transition are originated from of the  $d_{z^2}$  orbital instead of  $d_{x^2-y^2}$  to the lower energy degenerate  $d_{xy}, d_{x^2-y^2}$  and  $d_{xz}, d_{yz}$  orbitals i.e.  $d_{z^2} \rightarrow d_{xy}, d_{x^2-y^2}$  and  $d_{z^2} \rightarrow d_{xz}, d_{yz}$ .

**Table S2** Electronic spectra of compounds **1** to **4** in nm

| Compound | Intraligand transitions( $10^{-5}$ M) | dd band                                  |
|----------|---------------------------------------|------------------------------------------|
|          | $\epsilon$ in brackets                | ( $10^{-3}$ M)<br>$\epsilon$ in brackets |
| <b>1</b> | 270 (62,700), 370 (6,700)             | 594 (63)                                 |
| <b>2</b> | 283 (23,000), 377 (4,700)             | 597 (250)                                |
| <b>3</b> | 284 (23,000), 378 (8,000)             | 580 (221)                                |
| <b>4</b> | 283 (32,000), 376 (11,000)            | 614 (253)                                |

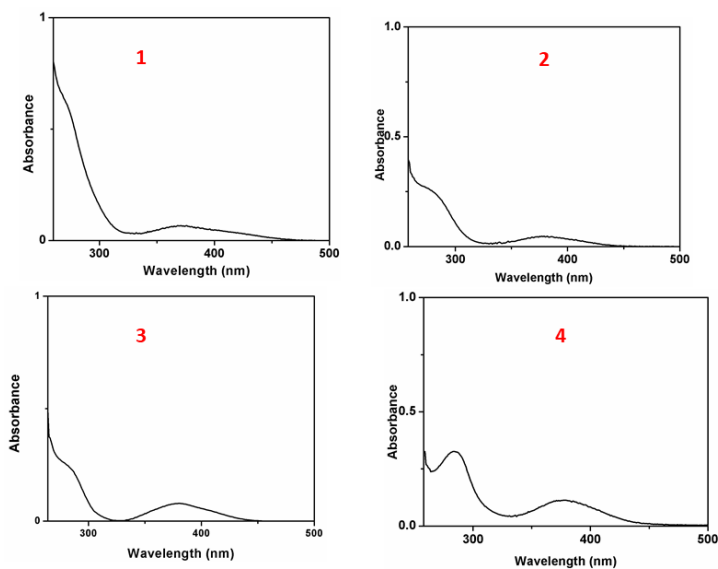

**Fig. S2** Intraligand transitions of compounds **1** to **4**.

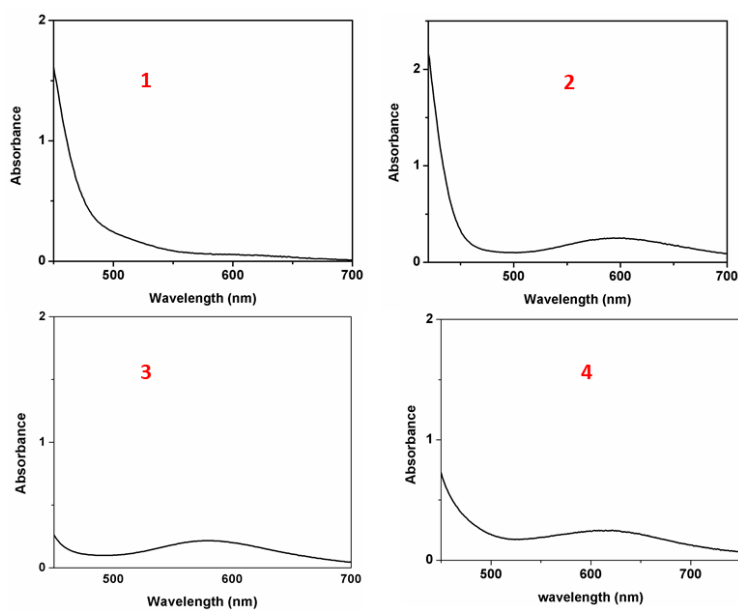

**Fig. S3** *dd* band of compounds **1** to **4**.

**Table S3** Crystal data and structural refinement parameter of compound **1**, **2** and **4**

| Compound          | <b>1</b>                                                                         | <b>2</b>                                                                        | <b>4</b>                                                        |
|-------------------|----------------------------------------------------------------------------------|---------------------------------------------------------------------------------|-----------------------------------------------------------------|
| Empirical formula | C <sub>21</sub> H <sub>24</sub> Br <sub>2</sub> N <sub>2</sub> O <sub>5</sub> Cu | C <sub>18</sub> H <sub>18</sub> Br <sub>2</sub> CuN <sub>2</sub> O <sub>5</sub> | C <sub>21</sub> H <sub>27</sub> CuN <sub>2</sub> O <sub>6</sub> |
| CCDC              | 1915472                                                                          | 2142350                                                                         | 2142351                                                         |
| Formula weight    | 607.78                                                                           | 565.70                                                                          | 467                                                             |
| Color             | Dark Green                                                                       | Dark Green                                                                      | Dark Green                                                      |
| Crystal system    | Monoclinic                                                                       | Orthorhombic                                                                    | Monoclinic                                                      |
| Space group       | <i>P2</i> <sub>1</sub> / <i>c</i>                                                | <i>Pnma</i>                                                                     | <i>C2</i> / <i>c</i>                                            |

| Cell parameters                                       |                                                                              |                                                                             |                                                                              |
|-------------------------------------------------------|------------------------------------------------------------------------------|-----------------------------------------------------------------------------|------------------------------------------------------------------------------|
| a (Å)                                                 | 12.80 (10)                                                                   | 8.740 (8)                                                                   | 23.61 (19)                                                                   |
| b (Å)                                                 | 12.57 (9)                                                                    | 28.03 (5)                                                                   | 9.489 (6)                                                                    |
| c (Å)                                                 | 14.21(10)                                                                    | 8.00(8)                                                                     | 20.94(18)                                                                    |
| $\alpha$ (°)                                          | 90                                                                           | 90                                                                          | 90                                                                           |
| $\beta$ (°)                                           | 99.73                                                                        | 90                                                                          | 112.9                                                                        |
| $\gamma$ (°)                                          | 90                                                                           | 90                                                                          | 90                                                                           |
| Volume V (Å <sup>3</sup> )                            | 2256.1(3)                                                                    | 1960(4)                                                                     | 4322.4(6)                                                                    |
| Z                                                     | 4                                                                            | 4                                                                           | 4                                                                            |
| Calculated density ( $\rho$ ) (Mg m <sup>-3</sup> )   | 1.789                                                                        | 1.917(4)                                                                    | 1.435                                                                        |
| Absorption coefficient, $\mu$ (mm <sup>-1</sup> )     | 4.546                                                                        | 5.223                                                                       | 1.050                                                                        |
| F(000)                                                | 1212                                                                         | 1116                                                                        | 1952                                                                         |
| Crystal size mm <sup>3</sup>                          | 0.50 x 0.45 x 0.40                                                           | 0.52 x 0.46 x 0.48                                                          | 0.300 x 0.200 x 0.200                                                        |
| $\theta$ (°) range for data collection                | 2.55 to 28.41                                                                | 2.647to 28.139                                                              | 2.715 to 28.49                                                               |
| Limiting indices                                      | -17 $\leq$ h $\leq$ 17,<br>-16 $\leq$ k $\leq$ 16,<br>-18 $\leq$ l $\leq$ 18 | -11 $\leq$ h $\leq$ 11,<br>-33 $\leq$ k $\leq$ 18,<br>-10 $\leq$ l $\leq$ 8 | -31 $\leq$ h $\leq$ 31,<br>-12 $\leq$ k $\leq$ 10,<br>-28 $\leq$ l $\leq$ 27 |
| Reflections collected                                 | 7445                                                                         | 7445                                                                        | 17280                                                                        |
| Unique Reflections (R <sub>int</sub> )                | 5598 (0.0355)                                                                | 7665 (0.0797)                                                               | 5471 (0.0292)                                                                |
| Absorption correction                                 | Semi-empirical from equivalents                                              | Semi-empirical from equivalents                                             | Semi-empirical from equivalents                                              |
| Maximum and minimum transmission                      | 0.708 and 0.532                                                              | 0.708 and 0.532                                                             | 0.825 and 0.792                                                              |
| Refinement method                                     | Full-matrixleast-squares on F <sup>2</sup>                                   | Full-matrixleast-squares on F <sup>2</sup>                                  | Full-matrixleast-squares on F <sup>2</sup>                                   |
| Data / restraints / parameters                        | 4211 / 0 / 288                                                               | 2007 / 14 / 143                                                             | 5471 / 0 / 284                                                               |
| Goodness-of-fit on F <sup>2</sup>                     | 1.072                                                                        | 1.026                                                                       | 1.031                                                                        |
| Final R indices [I > 2 $\sigma$ (I)]                  | R <sub>1</sub> = 0.0376<br>wR <sub>2</sub> = 0.1061                          | R <sub>1</sub> = 0.0531<br>wR <sub>2</sub> = 0.0996                         | R <sub>1</sub> = 0.0346<br>wR <sub>2</sub> = 0.0925                          |
| R indices (all data)                                  | R <sub>1</sub> = 0.0626<br>wR <sub>2</sub> = 0.1245                          | R <sub>1</sub> = 0.1305<br>wR <sub>2</sub> = 0.1199                         | R <sub>1</sub> = 0.0529<br>wR <sub>2</sub> = 0.1028                          |
| Largest difference peak and hole (e Å <sup>-3</sup> ) | 0.7820 and -0.656                                                            | 0.556 and -0.721                                                            | 0.302 and -0.390                                                             |

$$R_1 = \frac{\sum ||F_o| - |F_c||}{\sum |F_o|} \quad wR_2 = \left[ \frac{\sum w(F_o^2 - F_c^2)^2}{\sum w(F_o^2)^2} \right]^{1/2}$$

**Table S4** Selected bond lengths and angles of **1** obtained through X-ray and DFT studies

| Bond lengths | Experimental | B3LYP/def2-TZVP | Bond angles | Experimental | B3LYP/def2-TZVP |
|--------------|--------------|-----------------|-------------|--------------|-----------------|
|              |              |                 |             |              |                 |

|                         |         |      |                  |           |      |
|-------------------------|---------|------|------------------|-----------|------|
| <b>Cu(1)–O(3)</b>       | 1.93(2) | 1.86 | O(3)–Cu(1)–O(1)  | 90.6(9)   | 85.4 |
| <b>Cu(1)–O(1)</b>       | 1.94(2) | 1.86 | O(3)–Cu(1)–N(2)  | 177(10)   | 94.3 |
| <b>Cu(1)–N(2)</b>       | 1.96(3) | 1.87 | O(1)–Cu(1)–n(2)  | 91.5(10)  | 179  |
| <b>Cu(1)–N(1)</b>       | 1.97(3) | 1.87 | O(3)–Cu(1)–N(1)  | 90.4(10)  | 179  |
| <b>Cu(1)–<br/>O(1W)</b> | 2.34(3) | 1.28 | O(1)–Cu(1)–N(1)  | 156.1(11) | 94.3 |
|                         |         |      | N(2)–Cu(1)–N(1)  | 87.9(11)  | 85.7 |
|                         |         |      | O(3)–Cu(1) O(1W) | 92.9(10)  | 128. |
|                         |         |      | O(1)–Cu(1)–O(1W) | 97.4(10)  | 128  |

**Table S5** Hydrogen bonding and other supramolecular interactions present in **1**

| <b>Hydrogen bonding interactions</b>                  |                |                  |                  |                     |
|-------------------------------------------------------|----------------|------------------|------------------|---------------------|
| <b>D–H···A</b>                                        | <b>D–H (Å)</b> | <b>H···A (Å)</b> | <b>D···A (Å)</b> | <b>∠D–H···A (°)</b> |
| O(1W)–H(1W)···O(1)                                    | 0.84           | 2.19             | 2.85             | 137                 |
| O(1W)–H(1W)···O(2)                                    | 0.84           | 2.31             | 3.05             | 147                 |
| O(1W)–H(1W)···O(3)                                    | 0.85           | 2.17             | 2.92             | 149                 |
| O(1W)–H(1W)···O(4)                                    | 0.85           | 2.38             | 3.07             | 139                 |
| <b>Cg···Cg interactions</b>                           |                |                  |                  |                     |
| <b>Cg···Cg</b>                                        | <b>C–H···π</b> | <b>Metal···π</b> |                  |                     |
| Cg(4)···Cg(5) = 3.58 (Å)                              | –              | –                |                  |                     |
| Cg(4) = C(1) – C(2) – C(3) – C(4) – C(5) – C(6)       |                |                  |                  |                     |
| Cg(5) = C(14) – C(15) – C(16) – C(17) – C(18) – C(19) |                |                  |                  |                     |

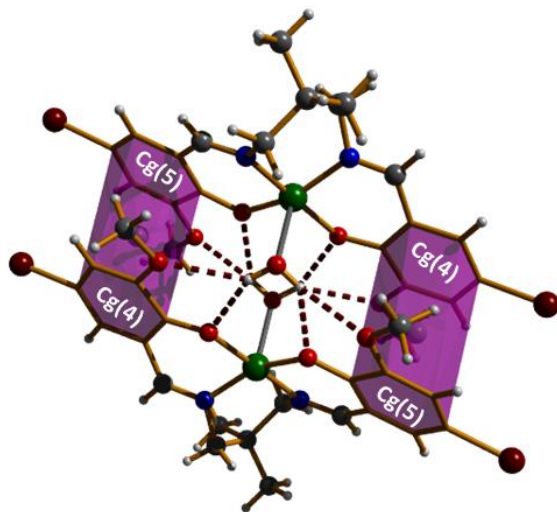

**Fig. S4**  $\pi \cdots \pi$  interactions in the supramolecular dimer of **1** (For clarity only water hydrogens are shown).

**Table S6** Selected bond lengths and bond angles of compound **2**

| Bond lengths (Å)   |           | Bond angles (°)   |            |
|--------------------|-----------|-------------------|------------|
| <b>Cu(1)–N(1)</b>  | 1.950(5)  | O(2)– Cu( 1)–N(1) | 166.40(2)  |
| <b>Cu(1)–N(2)</b>  | 1.950(5)  | O(2)– Cu( 1)–N(2) | 91.85(6)   |
| <b>Cu( 1)–O(1)</b> | 1.931(4)  | O(1)– Cu( 1)–N(1) | 91.85(19)  |
| <b>Cu( 1)–O(2)</b> | 1.931(4)  | O(1)– Cu( 1)–N(2) | 166.49(6)  |
| <b>O(1)–C(6)</b>   | 1.306(7)  | N(1)– Cu( 1)–N(2) | 82.50(3)   |
| <b>O(2)–C(16)</b>  | 1.304(2)  | O(1)– Cu(1)–O(2)  | 90.20(2)   |
| <b>N(1)–C(8)</b>   | 1.479(2)  | C(7)– O(1)–Cu(1)  | 127.30(3)  |
| <b>N(2)–C(9)</b>   | 1.527(10) | C(8) – N(1)–Cu(1) | 127.14 (4) |

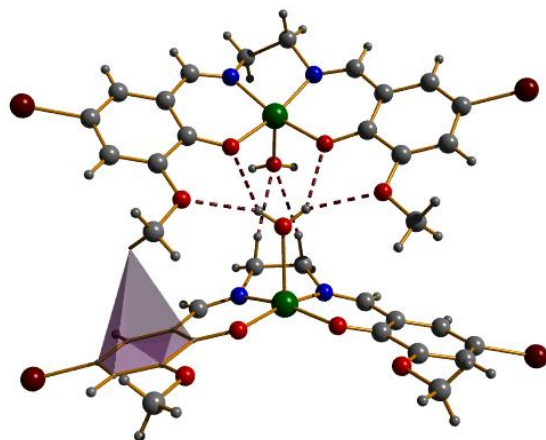

**Fig. S5** Formation of a dimer through different interactions in **2**.

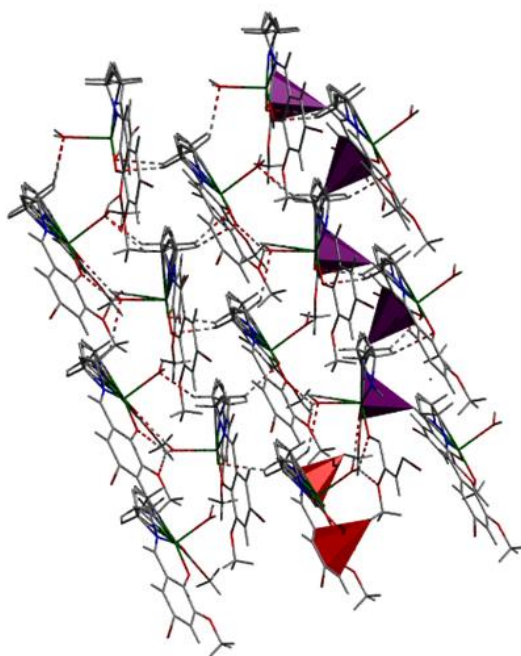

**Fig. S6** Formation of a 1-D sheet including the helical propagation via two different C–H $\cdots$  $\pi$  interactions in **2**.

**Table S7** Hydrogen bonding and other supramolecular interactions present in **2**

| <b>Hydrogen bonding interactions</b>             |                |                  |                  |                     |
|--------------------------------------------------|----------------|------------------|------------------|---------------------|
| <b>D–H···A</b>                                   | <b>D–H (Å)</b> | <b>H···A (Å)</b> | <b>D···A (Å)</b> | <b>∠D–H···A (°)</b> |
| O(1W)–H(1W)···O(1)                               | 0.82           | 2.28             | 2.90             | 140                 |
| O(1W)–H(1W)···O(2)                               | 0.82           | 2.23             | 2.97             | 150                 |
| O(1W)–H(1W)···O(3)                               | 0.97           | 2.57             | 3.37             | 140                 |
| O(1W)–H(1W)···O(4)                               | 0.97           | 2.56             | 3.36             | 136                 |
| C(9)–H(9A)···O(5)                                | 0.97           | 2.57             | 3.37             | 140                 |
| C(10)–H(10D)···O(1)                              | 0.97           | 2.56             | 3.36             | 136                 |
| <b>CH ··· π interactions</b>                     |                | <b>C–H ··· π</b> |                  | <b>Metal ··· π</b>  |
| Cg(6) ···H(1C) – C(1)                            | 2.99 (Å)       | –                |                  | –                   |
| Cg(6) ···H(8) – C(8)                             | 2.98 (Å)       |                  |                  |                     |
| Cg(4) ···H(10A) – C(10)                          | 2.93 (Å)       |                  |                  |                     |
| Cg(6) = C(2) – C(3) – C(4) – C(5) – C(6) – C(7)  |                |                  |                  |                     |
| Cg(4) = Cu(1) – O(1) – C(7) – C(6) – C(8) – N(1) |                |                  |                  |                     |

**Table S8** Selected bond lengths and bond angles of compound **4**

| <b>Bond lengths (Å)</b> |            | <b>Bond angles (°)</b> |            |
|-------------------------|------------|------------------------|------------|
| <b>Cu(1)–N(1)</b>       | 1.946(13)  | O(2)– Cu( 1)–N(1)      | 94.15(7)   |
| <b>Cu(1)–N(2)</b>       | 1.936(16)  | O(2)– Cu( 1)–N(2)      | 156.75(7)  |
| <b>Cu( 1)–O(2)</b>      | 1.885(13)  | O(3)– Cu( 1)–N(2)      | 93.57(6)   |
| <b>Cu( 1)–O(3)</b>      | 1.900 (14) | O(3)– Cu( 1)–N(1)      | 155.13(6)  |
| <b>O(1)–C(20)</b>       | 1.420(3)   | N(1)– Cu( 1)–N(2)      | 92.18(7)   |
| <b>O(4)–C(21)</b>       | 1.413 (3)  | O(1)– Cu( 1)–O(2)      | 90.02(6)   |
| <b>N(1)–C(7)</b>        | 1.279(2)   | C(1)–C(2)–C(6)         | 119.93(14) |
| <b>N(1)–C(8)</b>        | 1.460(2)   | C(3)–C(4)–C(5)         | 120.6(2)   |
| <b>N(2)–C(12)</b>       | 1.454(3)   |                        |            |
| <b>N(2)–C(13)</b>       | 1.285(3)   |                        |            |



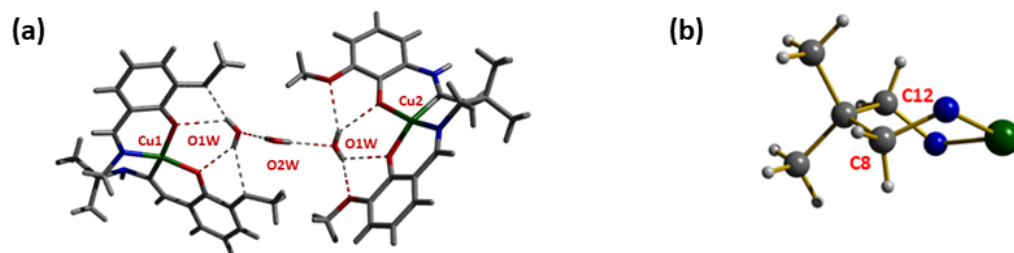

**Fig. S7** (a) Formation of a dimer through hydrogen bonding interaction (b) Twist boat conformation of a metallocycle in **4**.

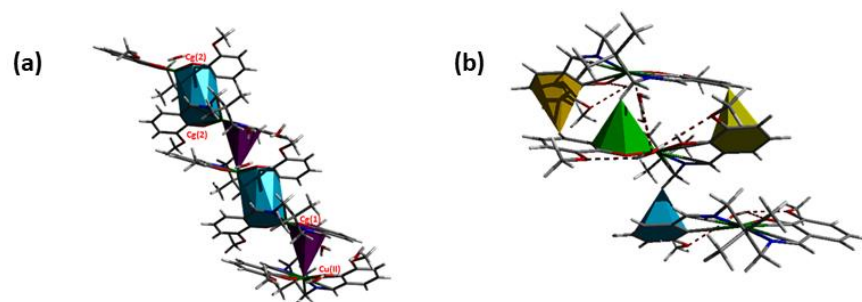

**Fig. S8** (a) Stair-like architecture through  $\pi \cdots \pi$  and metal  $\cdots \pi$  interactions (b) Different types of C–H  $\cdots \pi$  interactions in **4**.

**Table S9** Hydrogen bonding and other supramolecular interactions present in **4**

| Hydrogen bonding interactions                 |         |                                                             |                  |                                                                |        |
|-----------------------------------------------|---------|-------------------------------------------------------------|------------------|----------------------------------------------------------------|--------|
| D–H $\cdots$ A                                | D–H (Å) | H $\cdots$ A (Å)                                            | D $\cdots$ A (Å) | $\angle$ D–H $\cdots$ A (°)                                    |        |
| O(1w)–H(1w) $\cdots$ O(1)                     | 0.76    | 2.21                                                        | 2.92             | 157                                                            |        |
| O(1w)–H(1w) $\cdots$ O(2)                     | 0.76    | 2.49                                                        | 3.01             | 128                                                            |        |
| O(1w)–H(1w) $\cdots$ O(3)                     | 0.67    | 2.31                                                        | 2.88             | 144                                                            |        |
| O(1w)–H(1w) $\cdots$ O(4)                     | 0.67    | 2.42                                                        | 3.09             | 149                                                            |        |
| O(2w)–H(2w) $\cdots$ O(1w)                    | 0.68    | 2.24                                                        | 2.92             | 176                                                            |        |
| <b>Cg <math>\cdots</math> Cg interactions</b> |         | <b>CH <math>\cdots</math> <math>\pi</math> interactions</b> |                  | <b>Metal <math>\cdots</math> <math>\pi</math> interactions</b> |        |
| Cg(2) $\cdots$ Cg(2)                          | 3.44 Å  | C2–H2 $\cdots$ Cg(5)                                        | 2.81 Å           | Cu(1) $\cdots$ Cg(1)                                           | 3.84 Å |
|                                               |         | C8–H8B $\cdots$ Cg(5)                                       | 2.84 Å           |                                                                |        |

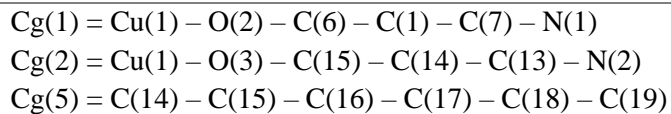

### 4.3.2. Characterization of Compound 3

We have made several attempts to crystallize the compound but not able to isolate single crystals. So we have characterised the compounds with other spectroscopic techniques.

Compound **3 (CuL3)** : Yield (72%); FTIR/cm<sup>-1</sup> (KBr) 3391 (–OH<sub>st</sub>) 2910 (CH<sub>st</sub>), 1630 (C=N), 1465 (Ar C=C), 1321 (C–O<sub>phenolic</sub>), 1230 (C–O<sub>methoxy</sub>) (Table 4.1, Fig. 4.1 ). Mass data: 560.89 (M+2, 100%). Anal. calc. for C<sub>19</sub> H<sub>18</sub> N<sub>2</sub> Br<sub>2</sub> Cu O<sub>4</sub>: C, 40.63 ; H, 3.23 ; N, 4.99. Found C, 40.63 ; H, 3.23 ; N, 4.99 %.

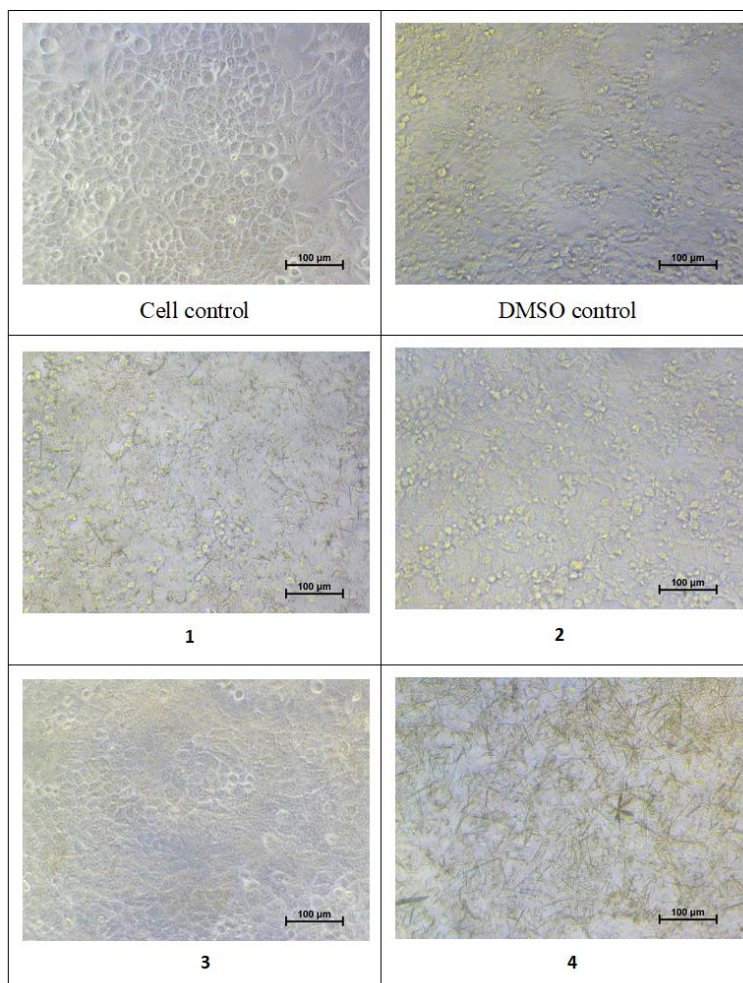

**Fig S9** Inverted phase contrast microscope images of HeLa cells treated with Cu(II) compounds at 37 °C for 24 hours. Images of DMSO alone and untreated cells were presented for reference.

(Objective: 20x)

**Table S10** MTT assay values of the compounds

| Compound | Concentration ( $\mu\text{g/L}$ ) |
|----------|-----------------------------------|
| 1        | 71.73                             |
| 2        | 132.78                            |
| 3        | 122.53                            |
| 4        | 47.00                             |
| DMSO     | 111.49                            |
| Cell     | 100.0                             |

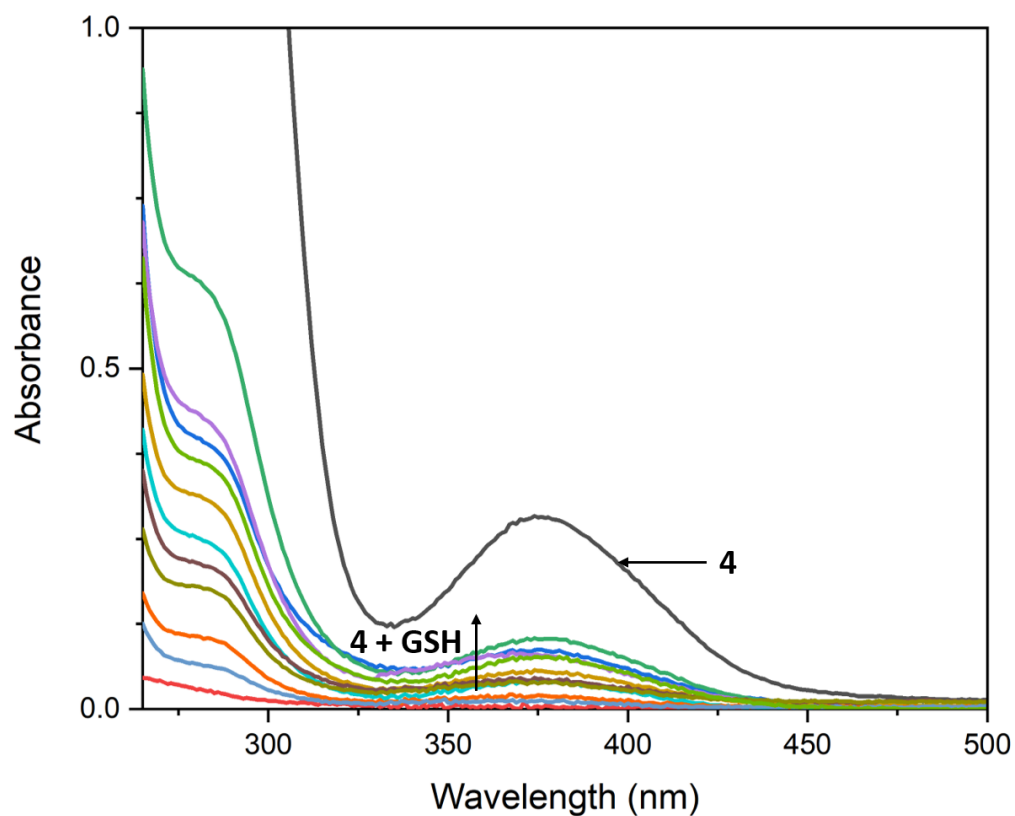

**Fig. S10** UV-Vis spectra of **4** along and the incremental addition of GSH to **4**

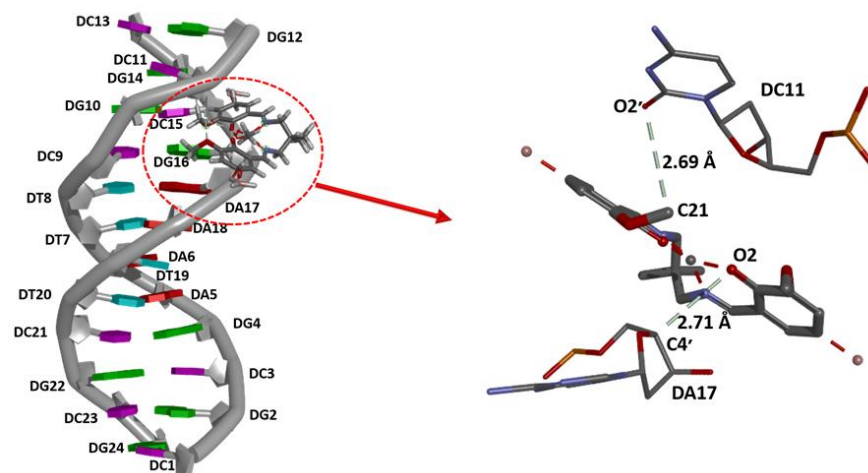

**Fig. S11** Docked model of compound **1** with B-DNA showing major supramolecular interactions present.

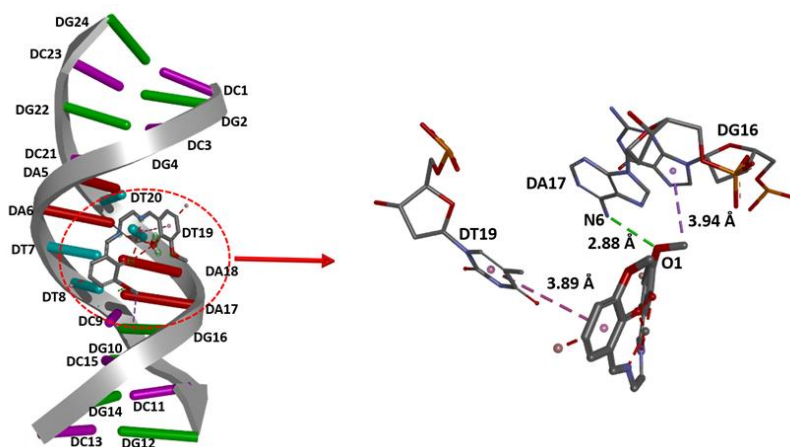

**Fig. S12** Docked model of compound **2** with B-DNA showing major supramolecular interactions present.

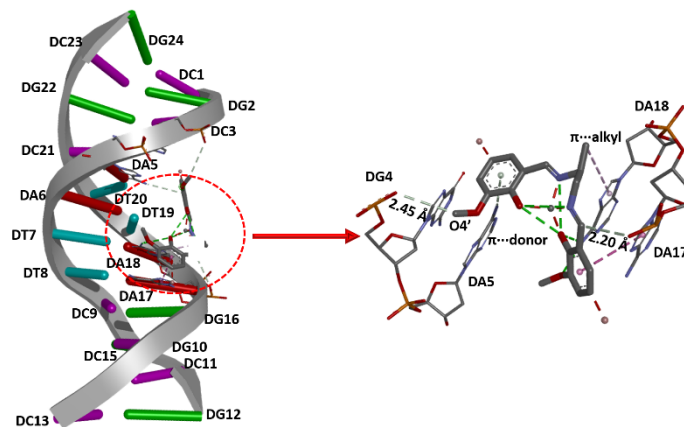

**Fig. S13** Docked model of compound **3** with B-DNA showing major supramolecular interactions present.

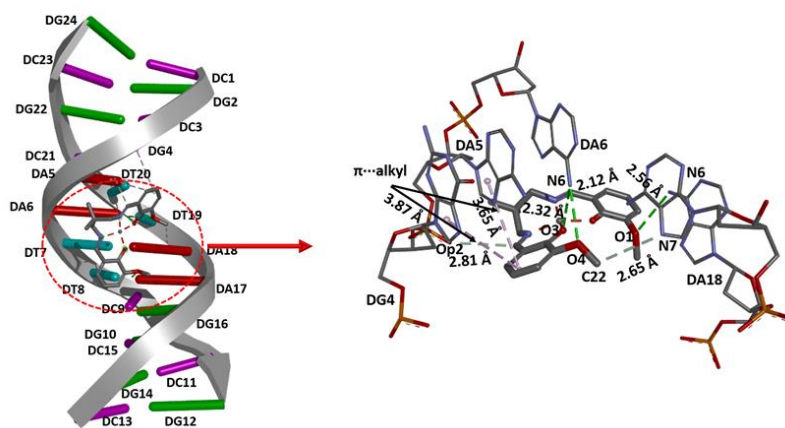

**Fig. S14** Docked model of compound **4** with B-DNA showing major supramolecular interactions present.

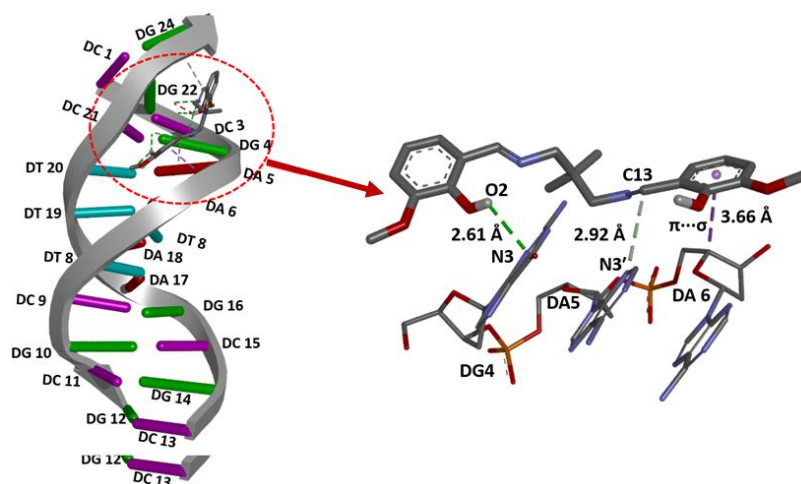

**Fig. S15** Docked model of the ligand of compound **4** with B-DNA showing major supramolecular interactions present.

**Table S11** Docking scores of compounds (**1** to **4**) with B-DNA and HSA

| Compounds               | <b>1</b> | <b>2</b> | <b>3</b> | <b>4</b> | <b>H<sub>2</sub>L4</b> |
|-------------------------|----------|----------|----------|----------|------------------------|
| <b>B-DNA (kcal/mol)</b> | -7.7     | -7.6     | -8.1     | -8.2     | -6.0                   |
| <b>HSA (kcal/mol)</b>   | -7.2     | -6.5     | -7.5     | -7.6     | -6.3                   |

**Table S12** The interactions between the compounds (**1** to **4** and **H<sub>2</sub>L4**) and B-DNA

| Compound | Base            | D-H...A                               | D...A  |
|----------|-----------------|---------------------------------------|--------|
| <b>1</b> | Cytosine (DC11) | C21-H21C...O2'                        | 2.69 Å |
|          | Adenine (DA17)  | C4'-H4'...O2                          | 2.71 Å |
|          | Adenine (DA17)  | N6-H6B...O1                           | 2.88 Å |
| <b>2</b> | Guanine (DG16)  | $\pi \cdots \sigma$                   | 3.94 Å |
|          | Thymine (DT19)  | $\pi \cdots \pi$ interaction (T-type) | 3.89 Å |
| <b>3</b> | Guanine (DG4)   | C20-H20A...O4'                        | 2.45 Å |
|          | Adenine (DA17)  | C12-H12...O4                          | 2.20 Å |
|          | Adenine (DA17)  | $\pi \cdots \pi$ interaction (T-type) | 3.40 Å |
|          | Adenine (DA18)  | $\pi \cdots$ alkyl                    | 3.22 Å |
|          | Adenine (DA05)  | $\pi \cdots$ donor interaction        | 3.65 Å |
| <b>4</b> | Adenine (DA06)  | N6-H6B...O4                           | 2.32 Å |
|          | Adenine (DA18)  | N6-H6A...O1                           | 2.56 Å |
|          | Adenine (DA18)  | C22-H22A...N7                         | 2.65 Å |

|                        |                                                                  |                     |        |
|------------------------|------------------------------------------------------------------|---------------------|--------|
| <b>4</b>               | Phosphate bridging between adenine (DA5) and guanine units (DG4) | C14–H14A···Op2      | 2.81 Å |
|                        | Guanine (DG4)                                                    | $\pi \cdots$ alkyl  | 3.65 Å |
|                        | Adenine (DA5)                                                    | $\pi \cdots$ alkyl  | 3.87 Å |
| <b>H<sub>2</sub>L4</b> | Guanine (DG04)                                                   | O2–H2···N3          | 2.61 Å |
|                        | Adenine (DA05)                                                   | C13–H13···N3'       | 2.32 Å |
|                        | Adenine (DA06)                                                   | $\pi \cdots \sigma$ | 3.66 Å |

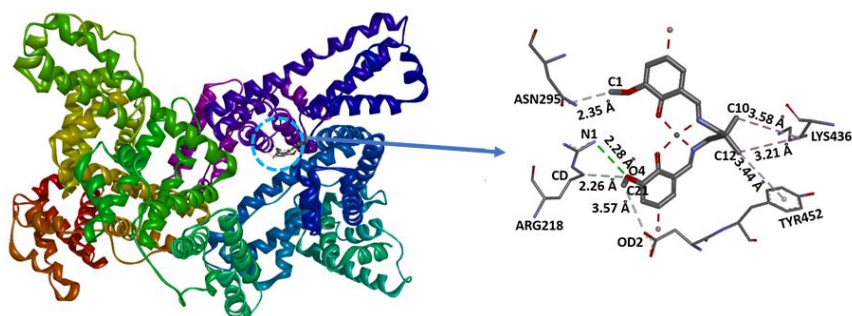

**Fig. S16** Docked model of compound **1** with HSA showing major supramolecular interactions present.

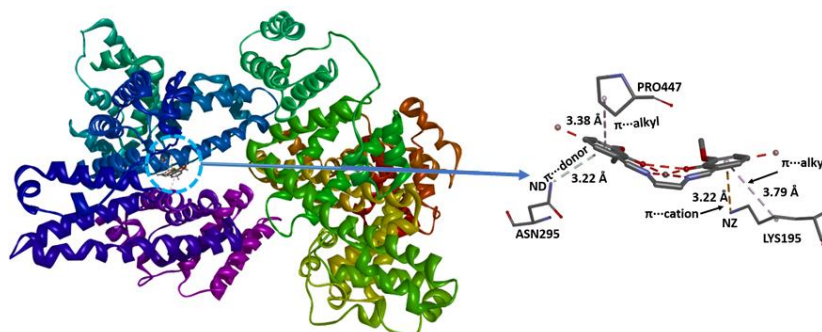

**Fig. S17** Docked model of compound **2** with HSA showing major supramolecular interactions present.

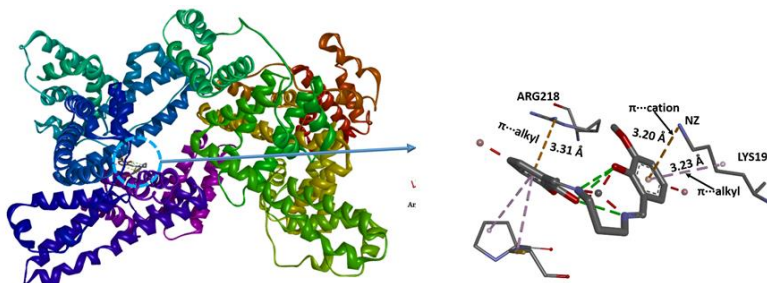

**Fig. S18** Docked model of compound **3** with HSA showing major supramolecular interactions present.

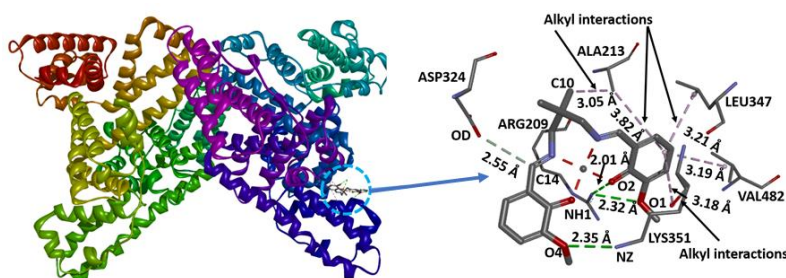

**Fig. S19** Docked model of compound **4** with HSA showing major supramolecular interactions present.

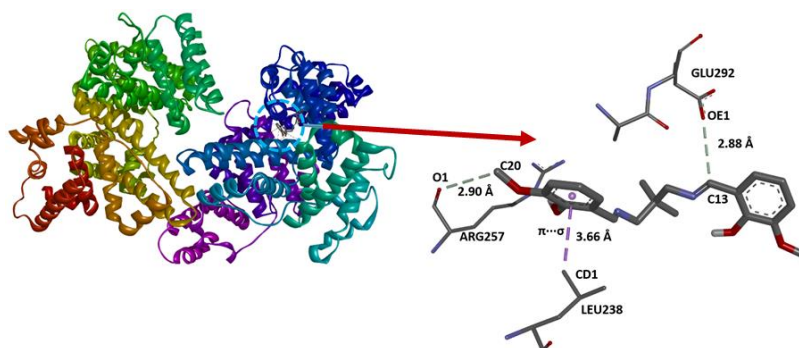

**Fig. S20** Docked model of **H<sub>2</sub>L4** with HSA showing major supramolecular interactions present.

**Table S13** The interactions between the compounds (**1** to **4** and ligand of **4**) and HSA protein

| Compound | Amino acid          | D–H···A                             | D···A  |
|----------|---------------------|-------------------------------------|--------|
| <b>1</b> | Arginine (ARG218)   | CD–H1D···O4                         | 2.26 Å |
|          | Arginine (ARG218)   | N1–H1···O4                          | 2.28 Å |
|          | Asparagine (ASN295) | C1–H1A···OD1                        | 2.35 Å |
|          | Lysine (LYS436)     | Alkyl interaction                   | 3.21 Å |
|          | Lysine (LYS436)     | Alkyl interaction                   | 3.58 Å |
|          | Tyrosine (TYR452)   | $\pi$ ···alkyl                      | 3.44 Å |
| <b>2</b> | Asparagine (ASN295) | $\pi$ ···donor hydrogen interaction | 3.22 Å |
|          | Lysine (LYS195)     | $\pi$ ···cation                     | 3.22 Å |
|          | Proline (PRO447)    | $\pi$ ···alkyl interaction          | 3.38 Å |
| <b>3</b> |                     |                                     |        |



|                        |                        |                      |                      |
|------------------------|------------------------|----------------------|----------------------|
|                        | Lysine (LYS195)        | $\pi \cdots$ alkyl   | 3.23 Å               |
|                        | Arginine (ARG218)      | $\pi \cdots$ alkyl   | 3.31 Å               |
|                        | Lysine (LYS195)        | $\pi \cdots$ cation  | 3.27 Å               |
| <b>4</b>               |                        |                      |                      |
|                        | Arginine (ARG209)      | N1–H1A $\cdots$ O2   | 2.01 Å               |
|                        | Arginine (ARG209)      | N1–H1B $\cdots$ O1   | 2.32 Å               |
|                        | Lysine (LYS351)        | Nz–HzB $\cdots$ O4   | 2.35 Å               |
|                        | Aspartic acid (ASP362) | C22–H22A $\cdots$ N7 | 2.55 Å               |
|                        | Alanine (ALA213)       | $\pi \cdots$ alkyl   | 3.05 Å<br>and 3.82 Å |
|                        | Leucine (LEU347)       | $\pi \cdots$ alkyl   | 3.21 Å<br>and 3.80 Å |
|                        | Lysine (LYS351)        | $\pi \cdots$ alkyl   | 3.18 Å               |
|                        | Valine (VAL482).       | $\pi \cdots$ alkyl   | 3.19 Å               |
| <b>H<sub>2</sub>L4</b> |                        |                      |                      |
|                        | Glutamic (GLU 292)     | C13–H13 $\cdots$ OE1 | 2.88 Å               |
|                        | Arginine (ARG 257)     | C20–H20A $\cdots$ O1 | 2.90 Å               |
|                        | Lysine (LEU 238)       | $\pi \cdots \sigma$  | 3.66 Å               |

## References

1. A. Sreekanth and M. R. P. Kurup, *Polyhedron*, 2003, **22**, 3321-3332.
2. B. Hathaway, G. Wilkinson, R. Gillard and J. McCleverty, *Journal*, 1987.
